# Supplementary material for: Marine Biodiversity in the Australian Region
Source: PLoS One. 2010 Aug 2;5(8):e11831. doi: 10.1371/journal.pone.0011831 (PMC2914019; doi:10.1371/journal.pone.0011831)
Supplement: Table S1 — Estimated numbers of marine species for each higher taxon represented in Australian waters and an indication of the taxonomic expertise for those groups within the Australian study area. In the column headed Australian known marine species (est.), are counts of species either described in litt. or anticipated to be present in Australian waters on the basis of projected percentages of global totals but not yet recorded. A smaller but more reliable number, formally described and listed in four major electronic databases are shown in the column of that heading. The databases are: The Australian Faunal Directory, AFD (ABRS); Codes for Australian Aquatic Biota, CAAB (CSIRO); OBIS (maintained in Australia by CSIRO); and the Online Zoological Collections of Australian Museums, OZCAM. The column headed Australian unknown species (est.) gives expert opinions on species not yet recognised as new species, or undiscovered, i.e. never collected. Numbers of introduced species come from [55]. Numbers of taxonomists are from a survey by the ABRS in 2003; figures may include present and past practicing experts and numbers may be fewer now. The number of spp in AFD, CAAB, OBIS and OZCAM, expressed as a % of the Australian known marine species (est). is used in our estimate of State of Knowledge: 5 = very well-known (>80% of est Aust species are in databases, ID guides <20 years old, and current taxonomic expertise); 4 = well-known (>50% of est Aust species are in databases, ID guides <50 years old, some taxonomic expertise), 3 = poorly known (<50% species of est Aust species are in databases, ID guides old or incomplete, no present expertise within region), 2 = very poorly known (only few species in databases, no ID guides, no expertise), 1 = unknown (no species in databases, no ID guides, no expertise). Spp = species. **** Table S1 is a protected Excel file **** (0.07 MB XLS) [file pone.0011831.s001.xls]

## Sheet: Sheet1
Kingdom	Phylum or Class	Class or Order	Order or Family	Australian known marine species (est.) **see next column for sources, etc.**	Source(s) / comments	Total species in AFD+CAAB+OBIS+OZCAM (7/10/2009) Totals for higher taxa are in bold.	State of Knowledge	No. endemic species	Australian unknown species (est.)	No. introduced spp	No. taxonomic experts (from ABRS survey - not all marine)	No. identification guides. (Counts from Appendix D only).
Fauna & flora - general ID Guides												7
Zooplankton, broad												3
Animalia
	Chordata					6328
	Vertebrata					5449
		Mammalia		59	AFD/CAAB/OBIS	59	5		very few 0?		3	1
			Cetacea	46	AFD/CAAB/OBIS	46	5
			Carnivora	12	AFD/CAAB/OBIS	12	5
			Sirenia	1	AFD/CAAB/OBIS	1	5
		Aves		155	AFD/CAAB/OBIS	158	5		very few. 0?		4	2
		Reptilia		42	AFD/CAAB/OBIS	48	5		very few.		4	1
			Testudines	6	AFD/CAAB/OBIS	7	5		0
			Crocodylia	1	AFD/CAAB/OBIS	1	5		0
			Sauria	0	AFD/CAAB/OBIS	0	5
			Serpentes	35	AFD/CAAB/OBIS	40	5		very few
		Pisces		5328	AFD/CAAB/OBIS	5184	5	0.25	800		18	17
		Agnatha		4	AFD/CAAB/OBIS	4	5	0.6
			Myxini	2	AFD/CAAB/OBIS	2	5
			Cephalaspidomorphi	2	AFD/CAAB/OBIS	2	5
		Elasmobranchii		355	AFD/CAAB/OBIS	353	5
		Holocephali (Chimaeriformes)		16	AFD/CAAB/OBIS	20	5
		Actinopterygii		4949	AFD/CAAB/OBIS	4807	5			12
	Tunicata (Urochordata)			849	AFD/CAAB/OBIS	866	5	0.5			1	2
		Ascidiacea		800	AFD/CAAB/OBIS	816	5			2
		Thaliacea		28	AFD/CAAB/OBIS	29	5
		Larvacea (Appendicularia)		21	AFD/CAAB/OBIS	21	5
	Cephalochordata			8	AFD/CAAB/OBIS	13	3	0.5			0
	Cephalorhyncha					0	1
		Loricifera		4	value from Chapman [45]; probably can update value for this report when sources checked.	0	1
		Priapulida		2	value from Chapman [45]; probably can update value for this report when sources checked.	0	1
	Mesozoa	Dicyemida, Rhomobozoa, Monoblastozoa		?	Chapman [45] cites a figure of 100 (ex ABRS) for mesozoa Australia, but this is almost certainly too high	0	2	unkonwn	unknown
		Orthonectida		?	Chapman [45] cites a figure of 100 (ex ABRS) for mesozoa Australia, but this is almost certainly too high	0	1
	Echinodermata			1481	AFD/CAAB/OBIS	1594	5	0.31	500		4	2
		Crinoidea				171	4
		Asteroidea				404	5			3
		Ophiuroidea				451	5
		Echinoidea				244	4
		Holothuroidea				319	4
	Hemichordata			17	AFD/CAAB/OBIS	17	3	0.25	5		0	1
	Xenoturbellida			0	AFD/CAAB/OBIS	0	1
	Platyhelminthes			1200	based on 1,593 in Chapman [45] x est. c.75% marine	536	3	unknown	3000		4	1
		Cestoda				435	3
		Turbellaria				91	3			1
		Digenea				4	3
		Monogenea				6	3
		Aspidogastrea				0	1
	Acanthocephala			56	value from Chapman [45]	1	2	unknown	unknown
	Rotifera (Rotatoria)			14	based on 683 in Chapman [45] x est. 2% marine	1	2				For all "Asc- helminth" groups - 4
	Nematomorpha			1	based on 32 in Chapman [45] x est. 2% marine	0	1
	Nematoda			1000	based on 2,060 in Chapman [45] x c. 50% marine	324	3	unknown	30000
	Kinorhyncha			8	value from Chapman [45]	1	3
	Tardigrada			20	based on 112 in Chapman [45] x c. 20% marine	0	1
	Arthropoda					6668
	Hexapoda	Insecta, Entognatha		5	3 spp. reported by Cheng & Schmitt, 1982, possibly a few others	24	1				27	1
	Myriapoda (including Diplopoda, Chilopoda)			0	all terrestrial	2	1
	Chelicerata					277	4
	Chelicerata: Arachnida			319	sum of relevant values below	61	4				"other arthropods" 17
		Acarina				56
			Halacaridae	104	Value from AFD online	55	4
		Pycnogonida		215	value from Chapman [45]	216	4	0.5	many more			1
		Merostomata (Limulidae)		0	none in Australia	0	1
	Crustacea			6775	based on 7,130 in Chapman [45] x c. 95% marine	6365	5	0.3	2500		16	5
	Crustacea: Maxillopoda					459
		Branchiura		10	based on global estimate 200 x Australia say 10% x marine say 50%	0
		Thecostraca (including Cirripedia)		130	based on global estimate 1,300 x Australia say 10%	141	4			7
			Ascothoracida	10	based on global estimate 100 x Australia say 10%	1	1
			Rhizocephala			8	1
			Acrothoracica + Thoracica			128	4
		Copepoda		1000	based on global 13,000 known species x 80% marine x 10% Australian	316	4
		Mystacocarida		1	based on global 12 marine species x Australia est. 10%	0	1
		Ostracoda		1300	based on global 6,400 marine species x Australia est. 20%	300	3
		Tantulocarida		3	based on global 30 marine species x Australia est. 10%	0	1
		Facetotecta		0	c.12 spp. globally, not known from Australia	0	1
		Pentastomida		10	value from Chapman [45]	0	1
	Crustacea: Malacostraca			4381	sum of relevant values below (NB - discrepancy with observed value at this point - to chase further)	5487	5			17
		Stomatopoda		146	value from AFD, June 2009	164	5
		Amphipoda		888	value from AFD, June 2009	1071	5
		Cumacea		228	value from AFD, June 2009	268	5
		Isopoda		850	value from AFD, June 2009	965	5
		Mictacea		1	value from AFD, June 2009	1	5
		Mysida		144	value from AFD, June 2009	149	5
		Lophogastrida		3	value from AFD, June 2009; NB suborder of Mysida	13	5
		Tanaidacea		38	value from AFD, June 2009	80	5
		Thermosbaenacea		1	value from AFD, June 2009	0	1
		Euphausiacea		53	value from AFD, June 2009	53	5
		Amphionidacea		1	value from AFD, June 2009	1	5
		Decapoda		2082	sum of relevant values below	2714	5
			Dendrobranchiata	148	value from AFD, June 2009	193	5
			Stenopodidea	6	value from AFD, June 2009	9	5
			Caridea	603	value from AFD, June 2009	698	5
			Astacidea + Palinura	66	value from AFD, June 2009	80	5
			Thalassinidea	80	value from AFD, June 2009	97	5
			Anomura	268	value from AFD, June 2009; includes Hippoidea, Pagurida	455	5
			Brachyura	911	value from AFD, June 2009	1156	5
	Crustacea: Branchiopoda (Cladocera)			2	based on global total 900 x marine 1% x Austr. 20%	118	5
	Crustacea: Cephalocarida			2	based on global total 9 x Austr. 20%	0
	Crustacea: Remipedia			3	based on global total 17 x Austr. 20%	1	2
	Crustacea: Leptostraca			8	based on global total 40 x Austr. 20%	6	4
	Chaetognatha			19	value from Chapman [45]	2	2
	Nemertea			81	value from Chapman [45]	72	4	0.65	200			1
	Annelida			1240	sum of values below	1558	4	50%?	1200		14	2
		Echiura		13	value from Chapman [45]	13	5
		Hirudinea		5	based on 49 in Chapman [45] x 10% marine	24	2
		Oligochaeta		2	based on 962 in Chapman [45] x 0.2% marine	91	3
		Polychaeta		1120	based on 1139 in Chapman [45] x 98% marine	1430	5			10
	Sipuncula			48	value from Chapman [45]	57	5					1
	Phoronida			6	value from Chapman [45]	8	5					1
	Brachiopoda			58	value from Chapman [45]	73	5					1
	Mollusca			5200	based on 8700 in Chapman [45] x 60% marine. But figures below total 17,157	8525	5	0.38	3500		13	7
		Aplacophora (Caudofoveata - Chaetodermomorpha)		6	AFD/CAAB/OBIS	6	5
		Aplacophora (Solenogastres - Neomeniomorpha)		6	AFD/CAAB/OBIS	6	5
		Polyplacophora		174	as per AFD/CAAB/OBIS	242	5			1
		Monoplacophora		0	c. 30 global species known, none yet from Australia	0	1
		Gastropoda		11200	based on global total 70,000 x marine 80% x Austr. 20%	6041	5			8
			Prosobranchia = Eogastropoda and Orthogastropoda			4624
			Opisthobranchia			578
			Gymnomorpha
			Pulmonata			609
		Cephalopoda		242	AFD/CAAB/OBIS	250	5
		Bivalvia		5400	based on global total 30,000 x marine 90% x Austr. 20%	1837	4			11
		Scaphopoda		129	AFD/CAAB/OBIS	137	5
	Gnathostomulida			8	value from Chapman [45]	0	1
	Gastrotricha			45	value from Chapman [45]	0	1
	Cycliophora			0	value from Chapman [45]	0	1
	Entoprocta (Kamptozoa)			16	value from Chapman [45]	16	4	0.87	many			1
	Bryozoa (Ectoprocta)			1000	value from Chapman [45]	1062	4					1
		Gymnolaemata				990				22
		Stenolaemata				71
	Placozoa			1	1 species, reportedly also known from Australia (Great Barrier Reef)	0	1	0	0
	Ctenophora			10	value from Chapman [45]	7	3		55
	Cnidaria (Coelenterates)			1705	value from Chapman [45]	1754	4	unknown	725		5
		Anthozoa: Hexacorallia		1043		1036	5
			Actiniaria			111	5
			Antipatharia			21	4
			Ceriantharia			1	4
			Corallimorpharia			8	4
			Zooanthidea			29	4
			Scleractinia			866	5
		Anthozoa: Octocorallia				208	5
			Alcyonacea			86	5
			Gorgonacea			101	5
			Pennatulacea			11	4
			Helioporacea			1
			Stolonifera			9
			Telestacea			0
		Cubozoa		9		12	4
		Hydrozoa		600		463	4			10
		Siphonophora				5	4
		Scyphozoa		51		21	4
	Myxozoa					0	1
	Porifera			1476	value from Chapman [45]	1701	4	0.56	2000		3	1
		Hexactinellida				43
		Calcarea				186
		Demospongiae				1472				4
		Sclerospongae				0
Fungi						0
			Lichens	0	none truly marine (except spalsh zone)	0					2
			Other Fungi	10	a few marine forms, guesstimate for Austr.	0					10
Protoctista (Protozoa)						645					3	1
	Foraminifera	Granuloreticulosa	80% are fossils	1000	based on global total 5000 (cf. >13,500 in Chapman) x Austr. 20%	120	3
	Dinoflagellata			400	based on global total 4000 x Austr. 20% x marine 50%	286	4			2
	Euglenophyta			10	based on global total 1000 x Austr. 20% x marine 5% (NB cited value at right may not be all marine)	64	2
	Sporozoa (Apicomplexa)			80	based on global total 4000 (guesstimate) x Austr. 20% x marine 10%	1	1
	Ciliophora		free living	40	based on global total 10000 x Austr. 20% x marine 2%	4	2
	Heliozoa		free living	0	none marine (?)	0	1
	Acantharea, Radiozoa (Radiolaria)	Polycystina, Phaeodarea	free living	800	based on global total 4000 x Austr. 20%	35	2
	Xenophyophora			8	based on global total 40 x Austr. 20%	0	1
	Zoomastigota	Choanoflagellida		12	based on global total 125 x Austr. 20% x marine 50%	51
Chromista						619						1
	Cryptophyta	Cryptophyceae	free living	25	based on 50 in Chapman [45], x c. 50% marine	4	2
	Bicoecia (Bicosoecida Grasse, 1926)		free living	6	based on global total 60 (guesstimate) x Austr. 20% x marine 50%	11	4
	Labyrinthista					1
		Labyrinthulidae		1	based on global total (8) given in Parker, 1982, x 90% marine x 20% Austr.	0	1
		Thraustochytrids		6	based on global total (28) given in Parker, 1982, x 20% Austr.	0
	Heterokontophyta					480	4
		Chrysophyceae		5	as per CAAB (most nonmarine)	8	4
		Xanthophyceae		4	as per CAAB (most nonmarine)	4	5			1
		Phaeophyceae		312	value from Chapman [45]	325	5			6
		Bacillariophyceae	free living (+15,000 fossil)	3000	based on global total in Chapman (20,000) x 30% (Australia) x 50% (marine)	141	2
		Raphidophyceae		5	based on global total in Chapman (23) x 40% (Australia) x 50% (marine)	0	1
	Bigyromonada			0	1(?) species known, not in Austr.	1	1
	Marine fungi					0	1
		Oomycota (Oomyceta)		60	based on global total in Chapman (950) x 20% (Australia) x 30% (marine)	0	1
	Opalinata			8	based on median global total in Chapman (200) x 20% (Australia) x 20% (marine)	4	2
	Haptophyta		free living (+1,000 fossil)	159	value from Chapman [45], all or almost all marine	119	4
Plantae	Angiospermae			75	value from CAAB	75	5				"algae" 8	5
		Mangroves		35	value from CAAB	36	5
		Seagrasses		40	value from CAAB	39	5
	Glaucophyta (Glaucocystophyta)	Glaucophyceae (Glaucocystophyceae)		0	none marine	0
	Cyanidiophyta	Cyanidiophyceae		0	none marine	0
	Rhodophyta	Rhodophyceae		1080	based on c.1100 in Chapman [45] x 98% marine	966	4			10
	Chlorophyta			780	median value from Chapman [45], appears not including FW orders	279	4			2
	Charophyta			1	1 genus (Lamprothamnium) found in brackish water, present in Australia (various refs.)	1	5
	Chlorarachniophyta			5	Small marine group, cited in Mcfadden (2007) but without exact figure for Austr. (quoted value is a guesstimate)	0	1
Procaryotes			most marine			9	2
	Cyanobacteria			8	based on CAAB, poss. underestimate, but few marine spp.	9	2
	Bacteria (Monera) - excluding Cyanobacteria (Cyanophyta)			150	based on global value (7500) in Chapman, x 20% (Aust.), x 10% marine	0	2
	Archaea			12	based on global value (100), x 20% (Aust.), x 60% marine	0	2
Viruses				30	based on value (300) in Chapman, x 10% marine	0	1
Total				50043		32897				129
Total Animalia				47902		30303				108
